# Supplementary material for: OsPP65 Negatively Regulates Osmotic and Salt Stress Responses Through Regulating Phytohormone and Raffinose Family Oligosaccharide Metabolic Pathways in Rice
Source: PubMed Central journal article supplement (PMC9250576; doi:10.1186/s12284-022-00581-5), 2022-07-02

Figure S1

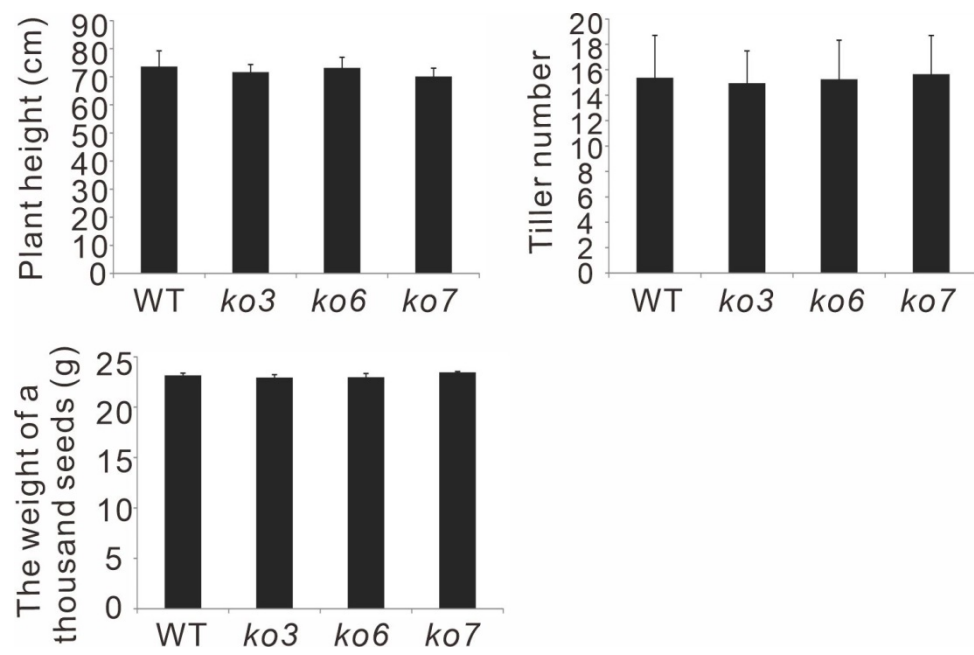

Figure S2

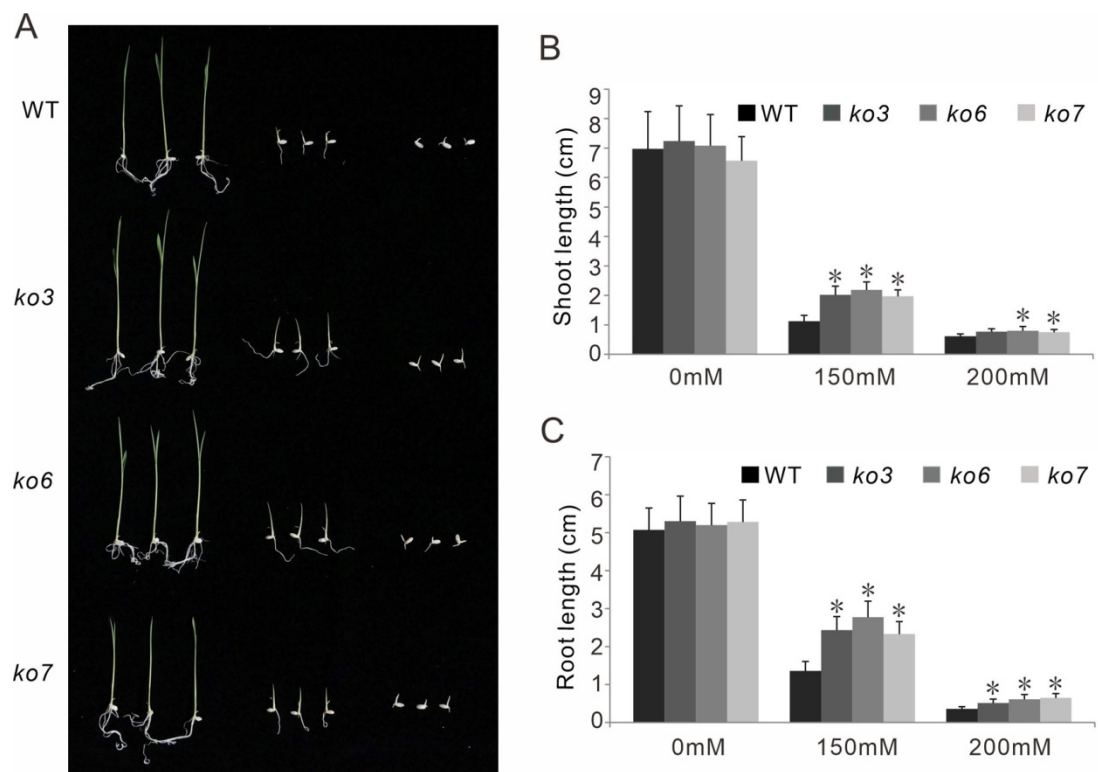

Figure S3

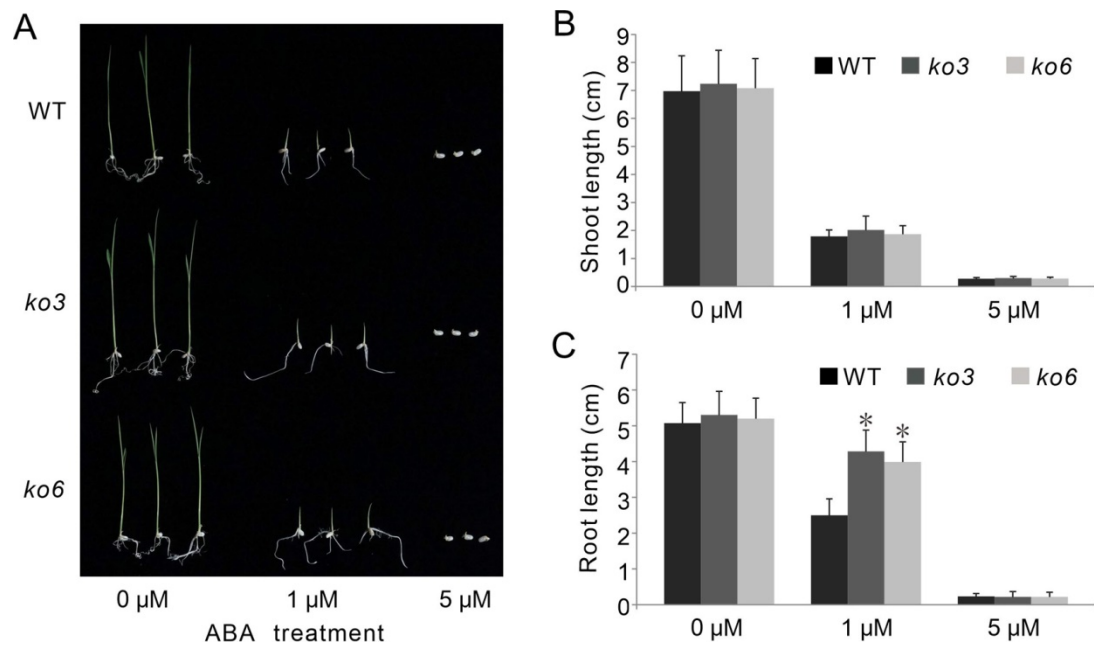

Figure S4

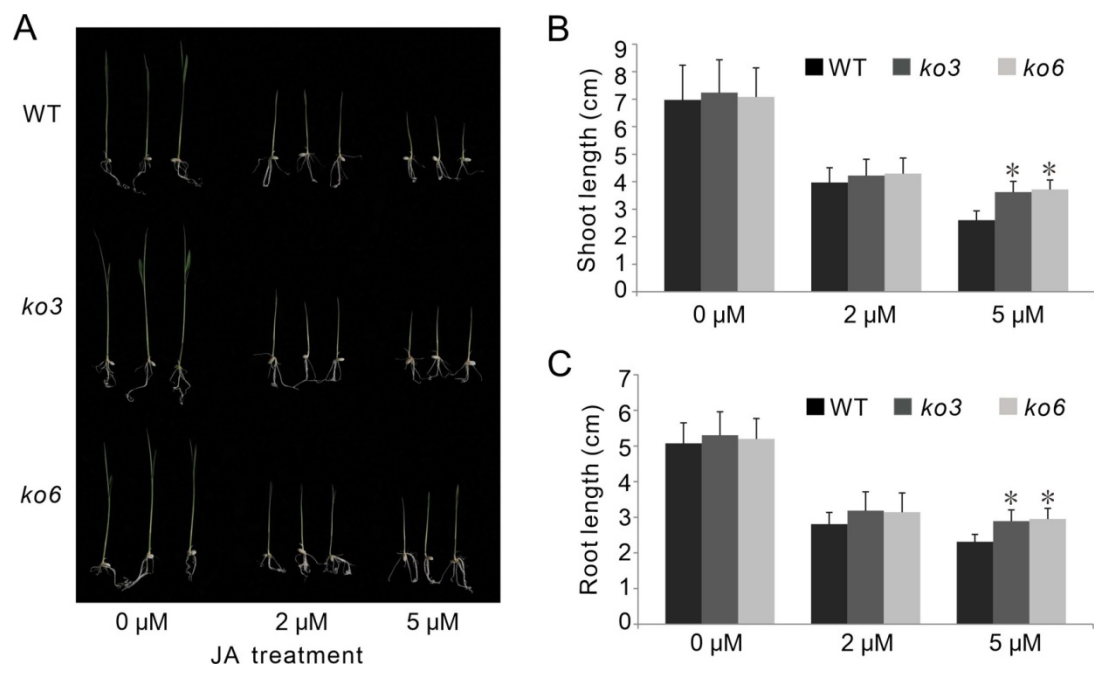

Figure S5

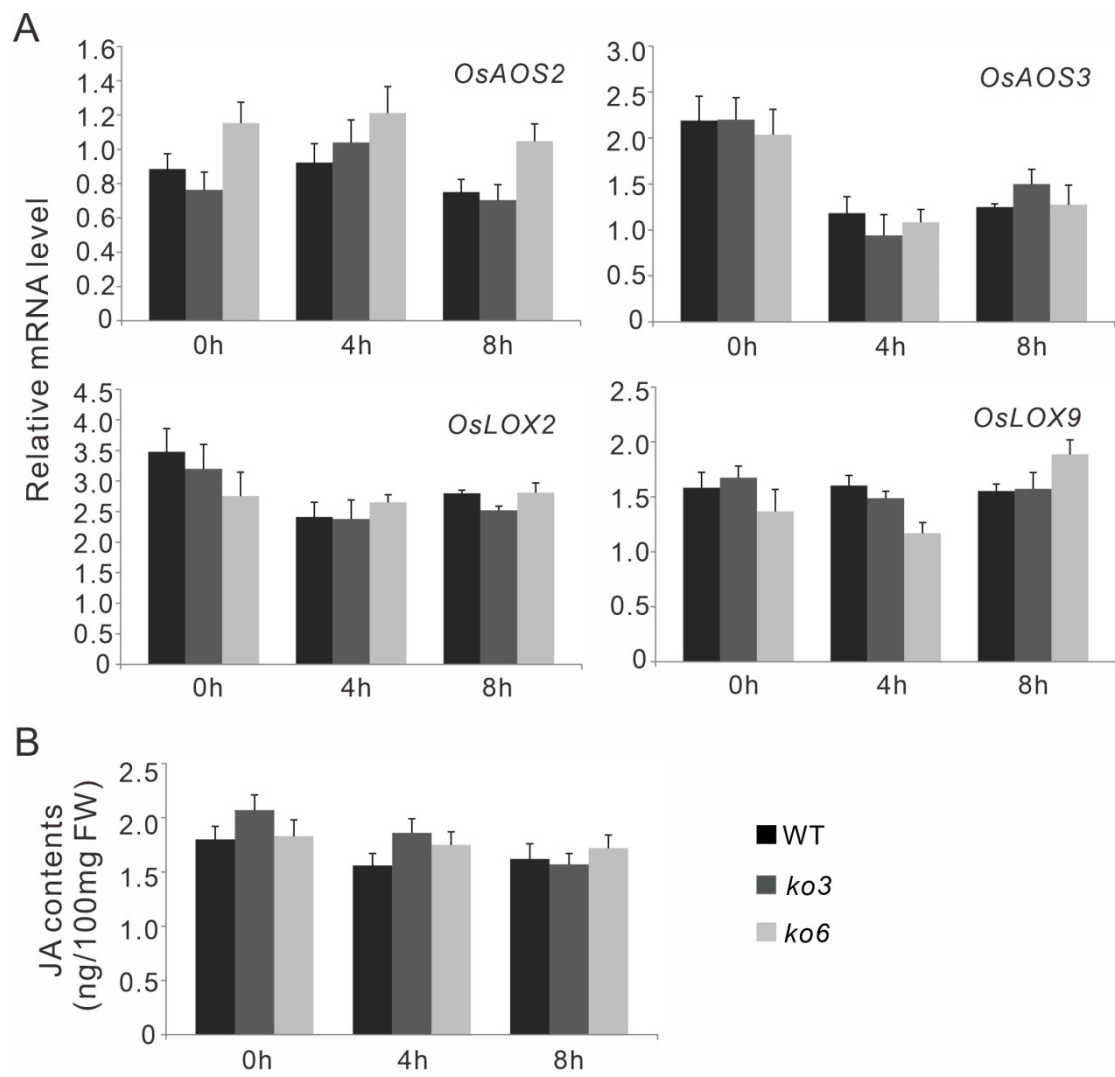

Figure S6

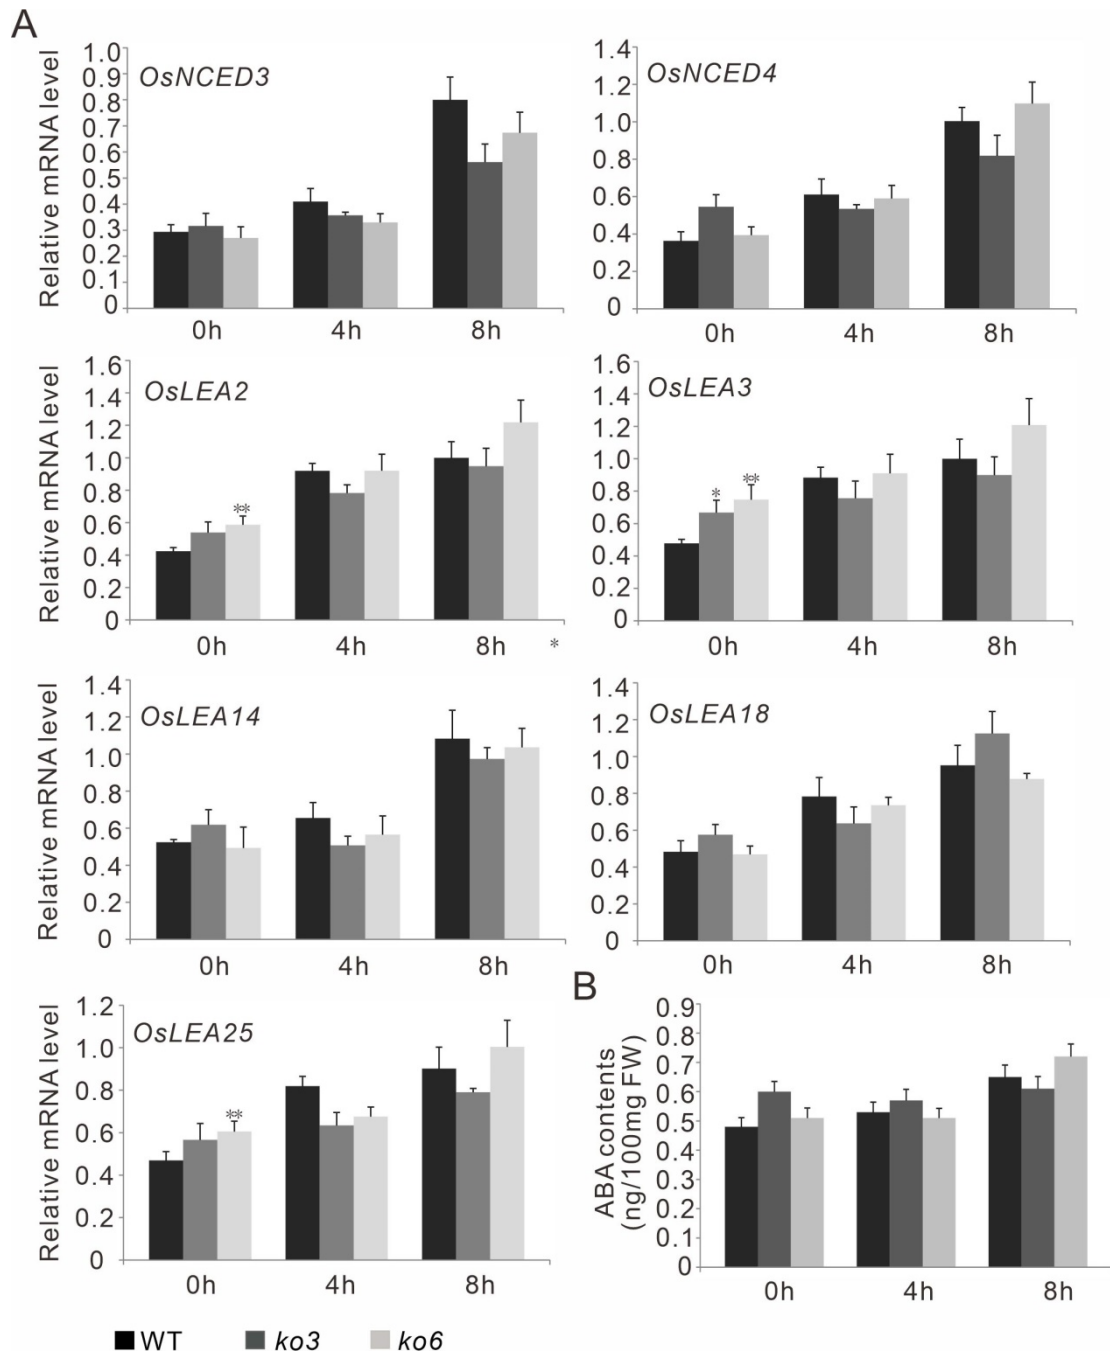

Figure S7

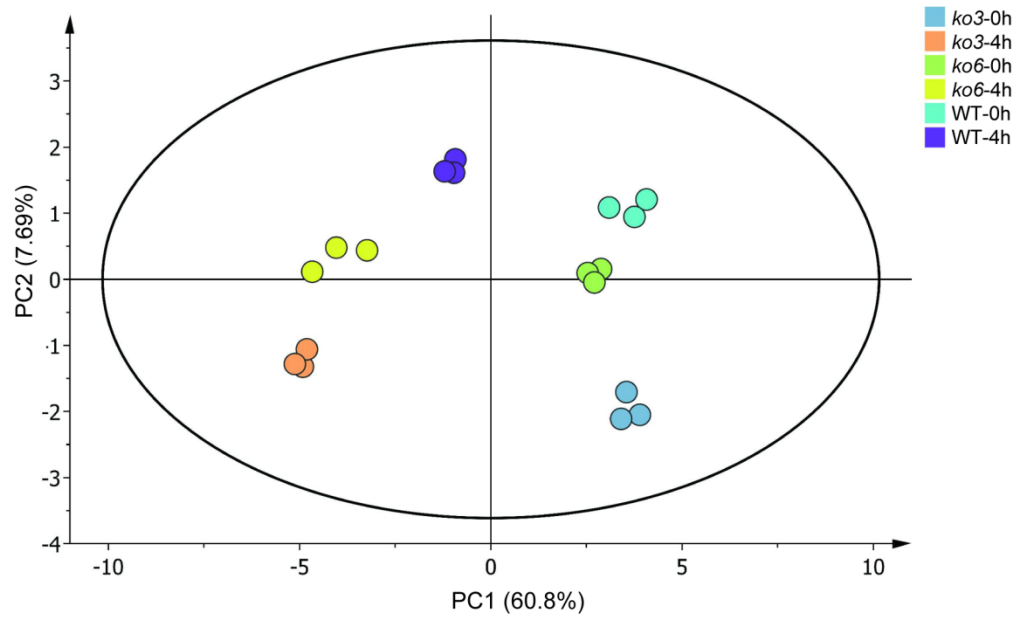

Figure S8

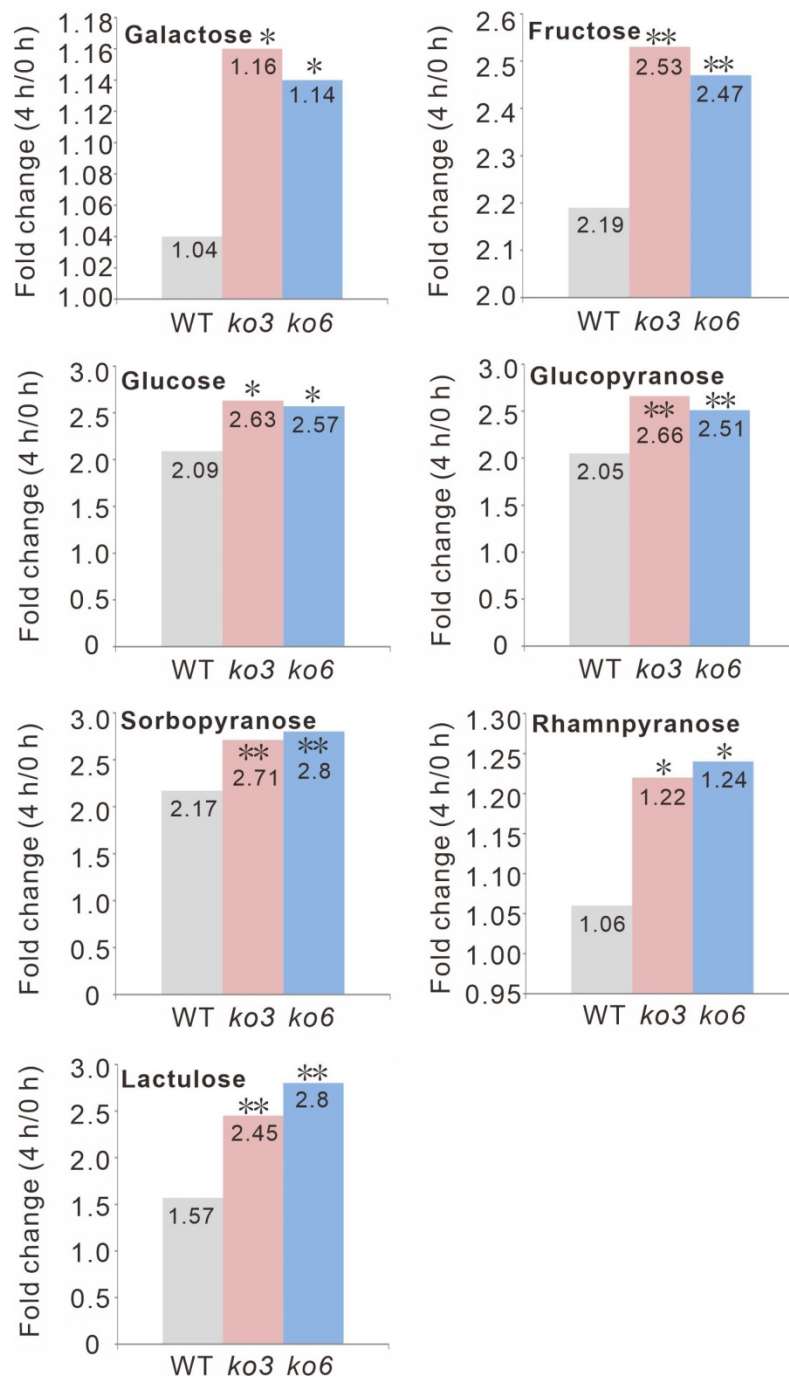



Figure S9

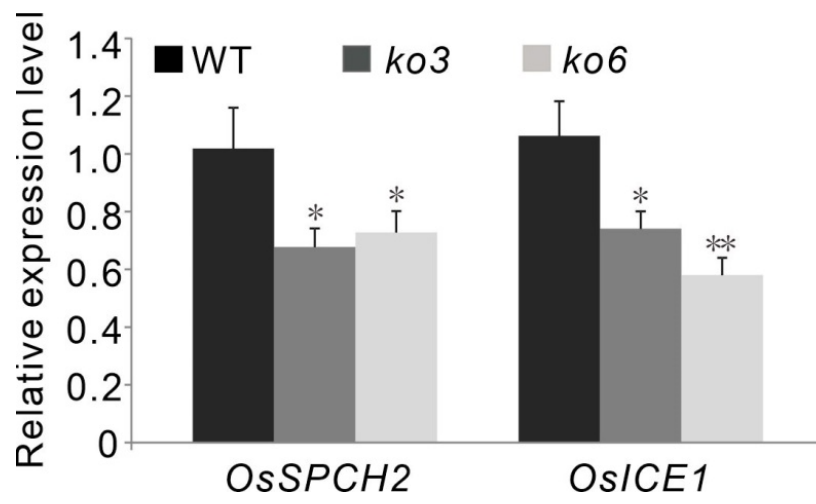

Figure S10

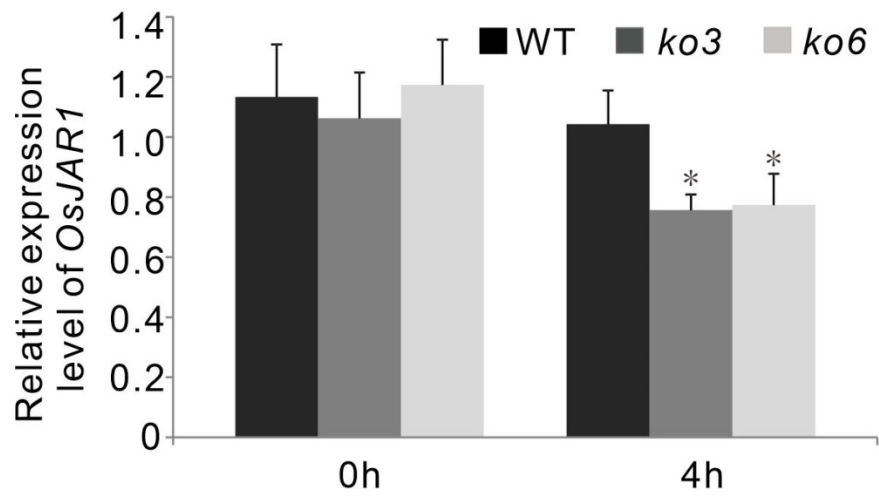

Supplement: 12284_2022_581_MOESM1_ESM.pdf [file 12284_2022_581_MOESM1_ESM.pdf]
